# Supplementary material for: Synthesis optimization of rich-urea carbon-dots and application in the determination of H2S in rich- and barren-liquids of desulphurizing solutions
Source: Royal Society of Chemistry journal article supplement (doi:10.1039/d1an01851e), 2021-01-01
Supplement: d1an01851e1.pdf [file d1an01851e1.pdf]

## **Synthesis optimization of rich-urea carbon-dots optical probe and its application in detection of H<sub>2</sub>S in desulfurizer and wastewaters**

Rong Wen,<sup>a</sup> Qiao-Hui Li,<sup>b</sup> Yong-Sheng Li,<sup>\*a</sup> Ya-Xiong Luo,<sup>c</sup> Xia Zhao<sup>d</sup> and Xiu-Feng Gao<sup>c\*</sup>

a. School of chemical engineering, Sichuan university, Chengdu 610065, China;

b. School of Engineering, Nanjing agricultural university, Nanjing, Jiangsu;

c. School of basic and forensic medicine, Sichuan university, Chengdu, Sichuan 610064, China

d. PetroChina Southwest Oil & Gasfield Company, Natural Gas Purification Plant General, Chongqing, 401259, China

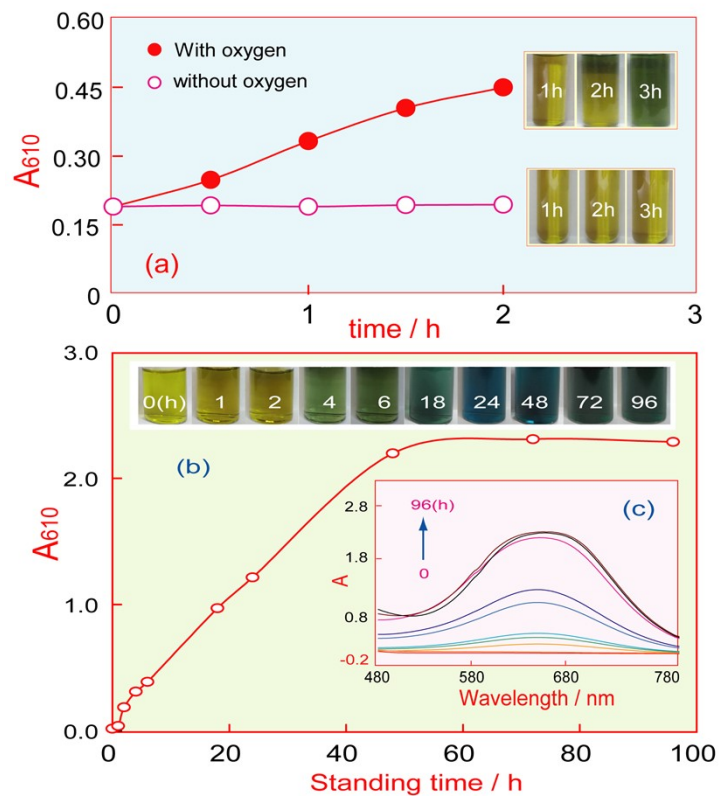

Fig. S1. The absorbance change of urea/CA-CDs under both aerobic and nonoxygen conditions (a) and effects of the standing time on the CDs color (b) and absorption spectrum (c).

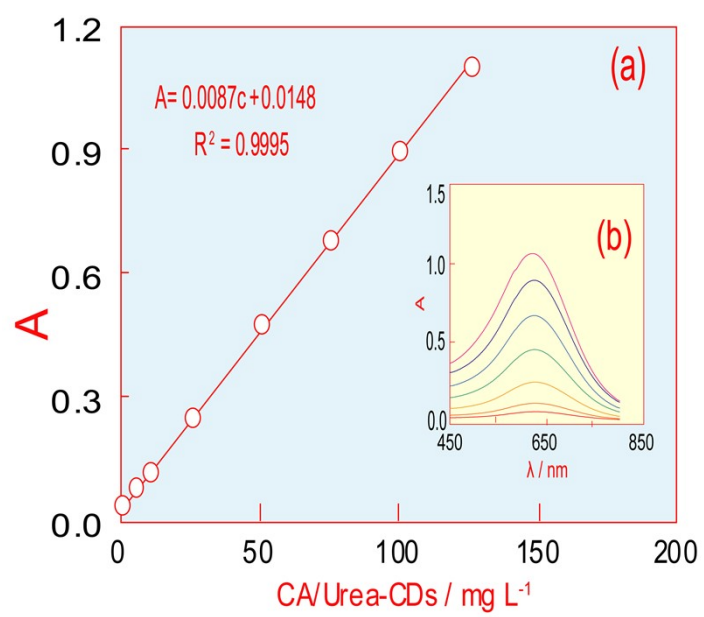

Fig. S2. Correlation between urea/CA-CDs concentration and absorbance.

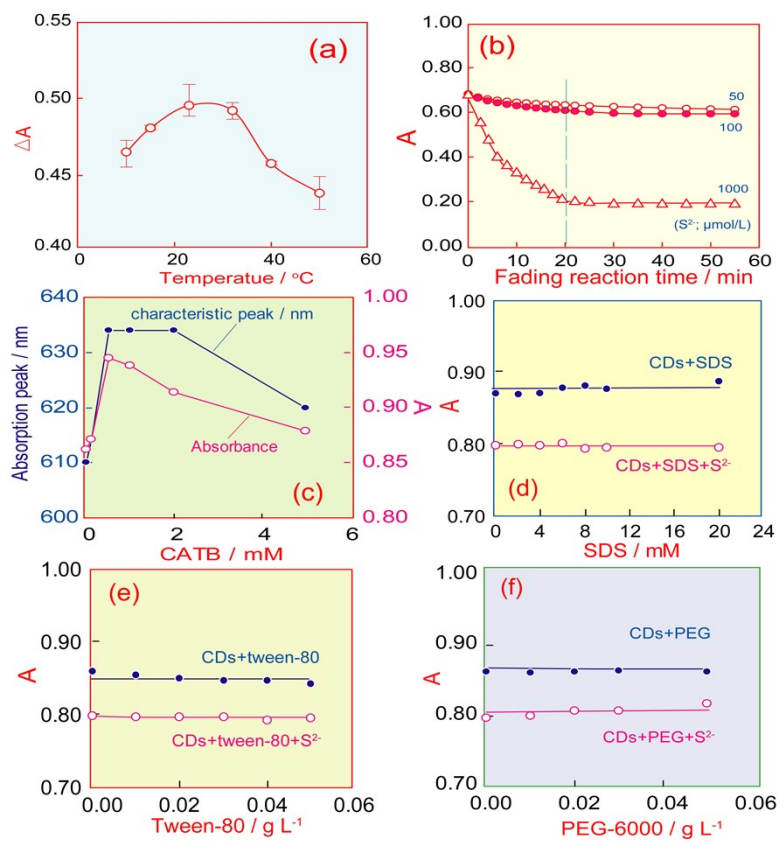

Fig. S3. Effects of temperature (a) and reaction time (b) as well as various surfactants (c-f) on the absorbance of urea/CA-CDs-S<sup>2-</sup> reaction system.

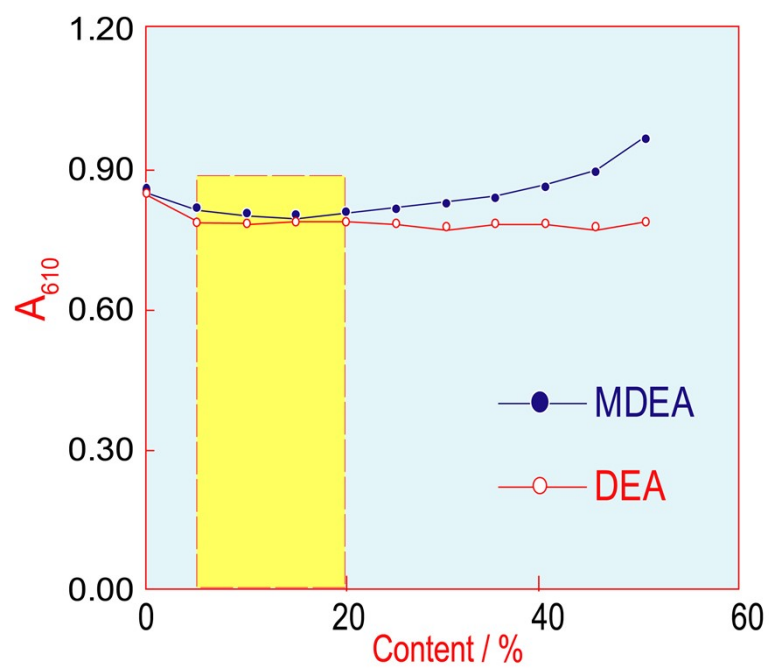

Fig. S4. Effect of MDEA and DEA on colors of CDs and CDs-S<sup>2-</sup>
